# Supplementary material
Source: PubMed Central journal article supplement (PMC6255993)
Supplement: BCP-84-2811-s001.pdf [file BCP-84-2811-s001.pdf]

**Evaluation of the adequacy of drug prescriptions in patients with chronic kidney disease: results from the CKD-REIN cohort**

S.M. Laville, M. Metzger, B. Stengel, C. Jacquelinet, C. Combe, D. Fouque, M. Laville, L. Frimat, C. Ayav, E. Speyer, B.M. Robinson, Z.A. Massy, S. Liabeuf

*British Journal of Clinical Pharmacology*

Corresponding author:

Bénédicte Stengel  
Director, Inserm U1018, Team 5  
UPS-UVSQ, CESP, Centre for Epidemiology and Population Health  
EpReC Team, Renal and Cardiovascular Epidemiology  
16, avenue P. Vaillant Couturier  
94 807 Villejuif cedex  
France  
Phone: + 33 1 4559 5039  
E-mail: benedicte.stengel@inserm.fr

**a. Number of inappropriate prescriptions per patient (n=3011)**

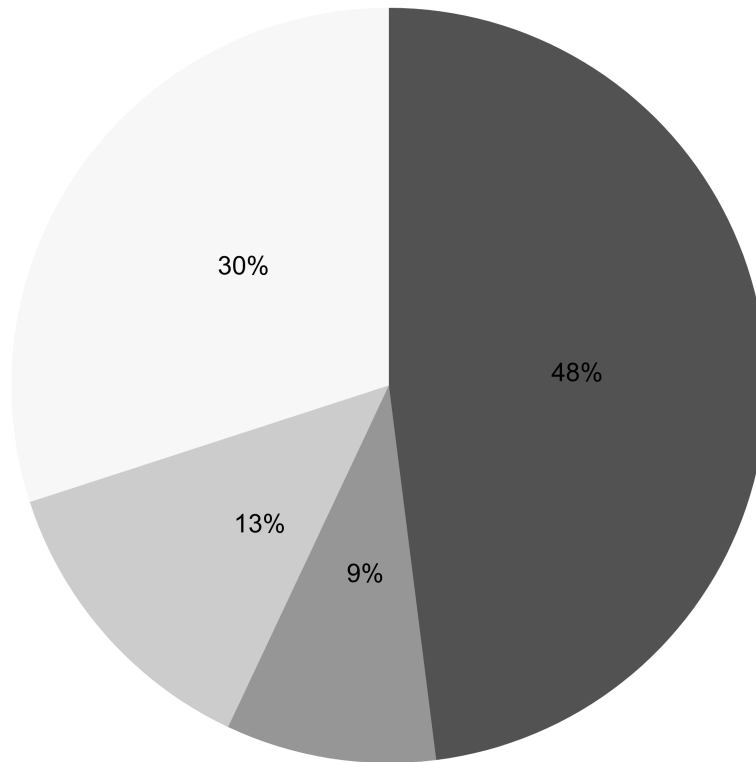

**b. Number of inappropriately high dose prescriptions per patient (n=3011)**

**c. Number of contraindicated prescriptions per patient (n=3011)**

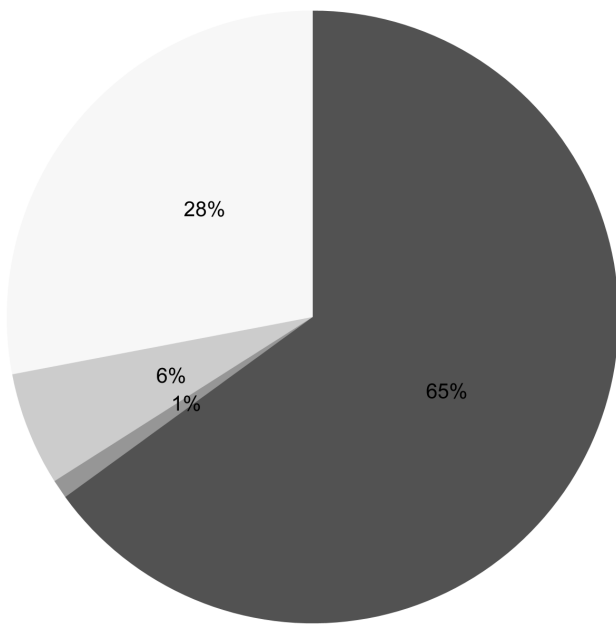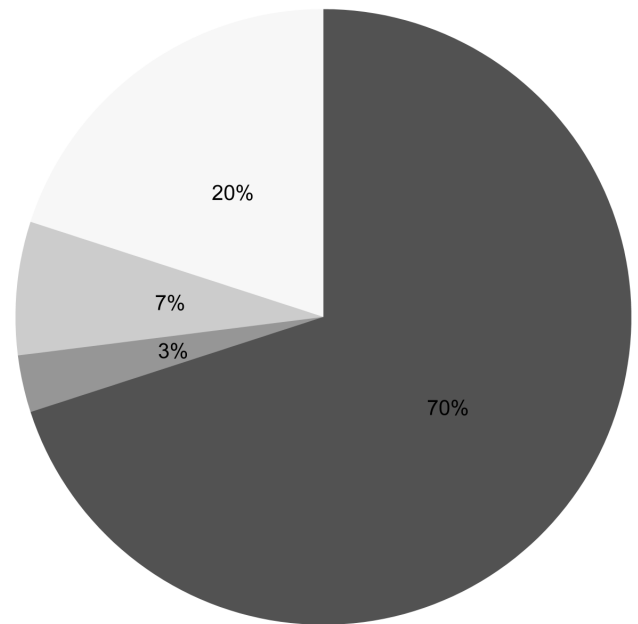

**Legend**

- No drug
- One drug
- Two drugs
- Three drugs or more

**Supplementary Figure 1:** Appropriateness of prescriptions, expressed as the number of inappropriate (i.e. contraindicated or inappropriately high dose drug), inappropriately high dose or contraindicated drugs per patient (n=3011 patients receiving at least one medication). a. Number of inappropriate prescriptions per patient. b. Number of inappropriately high dose prescriptions per patient. c. Number of contraindicated prescriptions per patient.
