# Supplementary material
Source: PubMed Central journal article supplement (PMC6255993)
Supplement: BCP-84-2811-s004.pdf [file BCP-84-2811-s004.pdf]

**Supplementary Table 1: Prescribing guidelines for medications examined in the study.**

A. Prescribing guidelines for all medications examined in the study (according to the French SPCs, as assessed from January 2017 to March 2017) B. Prescribing guidelines for antidiabetic agents examined in the study (according to the ERBP 2015 recommendations<sup>a</sup>) C. Prescribing guidelines for antidiabetic agents examined in the study (according to the KDOQI 2012 recommendations<sup>b</sup>).

**A. Prescribing guidelines for all medications examined in the study (according to the French SPCs, as assessed from January 2017 to March 2017).**

| Drugs                    | Creatinine clearance rate, mL/min | Maximum recommended dose level, mg |
|--------------------------|-----------------------------------|------------------------------------|
| <b>ANTIHYPERTENSIVES</b> |                                   |                                    |
| Methyldopa               | <60                               | 3000                               |
| Clonidine                | <60                               | 0.60                               |
| Moxonidine               | 30-60                             | 0.4                                |
|                          | 15-30                             | 0.3                                |
| Rilmenidine              | <15                               | CI                                 |
| Hydrochlorothiazide      | <30                               | CI                                 |
| Indapamide               | <30                               | CI                                 |
| Cicletanine              | 30-60                             | 100                                |
|                          | <30                               | CI                                 |
| Piretanide               | <20                               | CI                                 |
| Spironolactone           | <30                               | CI                                 |
| Eplerenone               | <30                               | CI                                 |
| Sotalol                  | 30-60                             | 160                                |
|                          | 10-30                             | 80                                 |
|                          | <10                               | CI                                 |
| Nadolol                  | 30-50                             | 80                                 |
|                          | <30                               | 40                                 |
| Tertatolol               | 10                                | CI                                 |
| Atenolol                 | 15-35                             | 50                                 |
|                          | <15                               | 25                                 |
| Acebutolol               | 25-50                             | 400                                |
|                          | <25                               | 200                                |
| Betaxolol                | <20                               | 20                                 |
| Bisoprolol               | <60                               | 10                                 |
| Celiprolol               | <15                               | NR                                 |
| Manidipine               | <10                               | CI                                 |
| Lercanidipine            | <10                               | CI                                 |
| Diltiazem                | <60                               | 180                                |
| Captopril                | 21-40                             | 100                                |
|                          | 11-20                             | 75                                 |
|                          | <10                               | 37.5                               |
| Enalapril                | <60                               | 40                                 |
| Lisinopril               | <80                               | 40                                 |
| Perindopril              | 30-60                             | 2.5                                |
|                          | <30                               | 1.25                               |
| Ramipril                 | <60                               | 5                                  |
| Quinapril                | <60                               | 40                                 |
| Benazepril               | <30                               | 5                                  |
| Trandolapril             | 11-30                             | 1                                  |
|                          | <10                               | 0.5                                |
| Zofenopril               | <45                               | 15                                 |
| Olmesartan medoxomil     | 20-60                             | 20                                 |
|                          | <20                               | NR                                 |
| Aliskiren                | <30                               | NR                                 |

| <b>LIPID-MODIFYING AGENTS</b>           |        |      |
|-----------------------------------------|--------|------|
| Rosuvastatin                            | 30-60  | 35   |
|                                         | <30    | CI   |
| Bezafibrate                             | <60    | CI   |
| Gemfibrozil                             | <30    | CI   |
| Fenofibrate                             | <30    | CI   |
| Ciprofibrate                            | <60    | CI   |
| <b>ANTITHROMBOTIC AGENTS</b>            |        |      |
| Enoxaparin                              | <30    | CI   |
| Nadroparin                              | <30    | CI   |
| Tinzaparin                              | <30    | CI   |
| Fondaparinux                            | <30    | CI   |
| Warfarin                                | <20    | NR   |
| Acenocoumarol                           | <20    | NR   |
| Fluindione                              | <20    | NR   |
| Dabigatran etexilate                    | 30-50  | 220  |
|                                         | <30    | CI   |
| Rivaroxaban                             | 15-50  | 15   |
|                                         | <15    | NR   |
| Apixaban                                | 15-30  | 5    |
|                                         | <15    | NR   |
| <b>DRUGS USED IN DIABETES</b>           |        |      |
| Metformin                               | 45-60  | 2000 |
|                                         | 30-45  | 1000 |
|                                         | <30    | CI   |
| Glibenclamide                           | <30    | CI   |
| Glipizide                               | <30    | CI   |
| Gliclazide                              | <30    | CI   |
| Glimepiride                             | <30    | CI   |
| Acarbose                                | <25    | CI   |
| Miglitol                                | <25    | CI   |
| Sitagliptin                             | 30-50  | 50   |
|                                         | <30    | 25   |
| Vildagliptin                            | <50    | 50   |
| Saxagliptin                             | 60     | 2.5  |
|                                         | <15    | NR   |
| Exenatide                               | <30    | NR   |
| Liraglutide                             | <30    | NR   |
| <b>DRUGS FOR ACID-RELATED DISORDERS</b> |        |      |
| Salt associations (ex: Maalox®)         | <30    | CI   |
| Antacids (ex: Carbosymag®, Gelox®)      | <30    | CI   |
| Ranitidine                              | <50    | 150  |
| Metoclopramide                          | <15    | 7.5  |
| Domperidone                             | <30    | 20   |
| Mesalazine                              | <30    | CI   |
| <b>ANTIGOUT PREPARATIONS</b>            |        |      |
| Allopurinol                             | 80-100 | 300  |
|                                         | 40-80  | 200  |
|                                         | 20-40  | 100  |
|                                         | <20    | 50   |
| Probenecid                              | <60    | CI   |
| Colchicine                              | 30-60  | 2    |
|                                         | <30    | CI   |
| <b>ANALGESICS</b>                       |        |      |

|                                             |       |            |
|---------------------------------------------|-------|------------|
| Dihydrocodeine                              | 30-60 | 120        |
|                                             | <30   | CI         |
| Tramadol                                    | 10-60 | 400        |
|                                             | <10   | NR         |
| Tramadol (Sustained release formulations)   | 30-60 | 200        |
|                                             | <30   | NR         |
| Acetylsalicylic acid                        | <30   | CI         |
| Paracetamol                                 | <30   | 3000       |
| Naratriptan                                 | 30-80 | 2.5        |
|                                             | <30   | CI         |
| Zolmitriptan                                | <15   | CI         |
| Rizatriptan                                 | 30-80 | 10         |
|                                             | 30    | CI         |
| Eletriptan                                  | <30   | CI         |
| <b>PSYCHOLEPTICS</b>                        |       |            |
| Clozapine                                   | <30   | CI         |
| Amisulpride                                 | 30-60 | 600        |
|                                             | 10-30 | 400        |
| Risperidone                                 | <60   | 3          |
| Diazepam                                    | <60   | 20         |
| Oxazepam                                    | <60   | 75         |
| Clorazepate potassium                       | <60   | 45         |
| Lorazepam                                   | <60   | 3.75       |
| Bromazepam                                  | <60   | 18         |
| Clobazam                                    | <60   | 30         |
| Prazepam                                    | <60   | 15         |
| Alprazolam                                  | <60   | 0.5        |
| Nordazepam                                  | <60   | 7.5        |
| Clotiazepam                                 | <60   | 15         |
| Hydroxyzine                                 | <60   | 150        |
| Buspirone                                   | <30   | CI         |
| Etifoxine                                   | <30   | CI         |
| Lormetazepam                                | <60   | 1          |
| Loprazolam                                  | <60   | 0.5        |
| <b>MINERAL SUPPLEMENTS</b>                  |       |            |
| Potassium chloride                          | <60   | CI         |
| Potassium citrate                           | <60   | CI         |
| Potassium carbonate acid                    | <60   | CI         |
| Magnesium aspartate                         | <30   | CI         |
| Magnesium lactate                           | <30   | CI         |
| Magnesium pidolate                          | <30   | CI         |
| Magnesium oxyde                             | <30   | CI         |
| Other mineral elements (Ex: Phosphoneuros®) | <60   | CI         |
| <b>CARDIAC THERAPY</b>                      |       |            |
| Digoxin                                     | <30   | 0.0625     |
| Disopyramide                                | 31-60 | 250        |
|                                             | <30   | 200        |
| Flecainide                                  | <20   | 100        |
| Cibenzoline                                 | 20-40 | 3MG/KG/D   |
|                                             | 10-20 | 2.5MG/KG/D |
| Midodrine                                   | <30   | CI         |
| Trimetazidine                               | 30-60 | 40         |
|                                             | <30   | CI         |
| <b>UROLOGICALS</b>                          |       |            |
| Solifenacine                                | <30   | 5          |

|                                        |       |              |
|----------------------------------------|-------|--------------|
| Trospium                               | 10-30 | 20           |
| Yohimbine                              | <30   | CI           |
| Tadalafil                              | <30   | 10           |
| Vardenafil                             | <15   | CI           |
| Alfuzosine                             | <30   | CI           |
| Sildenafil                             | <30   | NR           |
| <b>PSYCHOANALEPTICS</b>                |       |              |
| Imipramine                             | <60   | 150          |
| Clomipramine                           | <60   | 250          |
| Trimipramine                           | <60   | 150          |
| Amitriptyline                          | <60   | 150          |
| Citalopram                             | <20   | CI           |
| Paroxetine                             | <60   | 20           |
| Tianeptine                             | <60   | 25           |
| Venlafaxine                            | <30   | 187.5        |
| Milnacipran                            | 60-80 | 100          |
|                                        | 30-60 | 50           |
|                                        | 10-30 | 25           |
| Duloxetine                             | <30   | CI           |
| Piracetam                              | <60   | 2400         |
| Galantamine                            | <9    | CI           |
| Memantine                              | 30-49 | 20           |
|                                        | 6-29  | 10           |
| <b>ANTIEPILEPTICS</b>                  |       |              |
| Phenobarbital                          | <60   | 3 MG/KG/D    |
| Primidone                              | <60   | 1500         |
| Clonazepam                             | <60   | 0.05 MG/KG/D |
| Valproic acid                          | <60   | 30 MG/KG/D   |
| Topiramate                             | <70   | 250          |
| Gabapentin                             | 50-80 | 1800         |
|                                        | 30-49 | 900          |
|                                        | 15-29 | 600          |
|                                        | <15   | 300          |
| Levetiracetam                          | 50-80 | 2000         |
|                                        | 30-49 | 1500         |
|                                        | <30   | 1000         |
| Pregabalin                             | 60-80 | 600          |
|                                        | 30-60 | 300          |
|                                        | <15   | 75           |
| <b>ANTIBACTERIALS FOR SYSTEMIC USE</b> |       |              |
| Amoxicillin                            | 10-30 | 1000         |
|                                        | <10   | 500          |
| Cloxacillin                            | 30    | 2000         |
| Cephalexin                             | 30-60 | 1000         |
|                                        | 6-30  | 500          |
|                                        | <5    | 250          |
| Cefotiam                               | <20   | CI           |
| Cefixime                               | <20   | 200          |
| Cefpodoxime                            | <40   | 200          |
| Clarithromycin                         | <30   | 500          |
| Telithromycin                          | <30   | NR           |
| Ofloxacin                              | 20-60 | 200          |
|                                        | <20   | 100          |
| Ciprofloxacin                          | 30-60 | 1000         |
|                                        | <30   | 500          |
| Levofloxacin                           | 50-60 | 1000         |

|                                                          |        |           |
|----------------------------------------------------------|--------|-----------|
|                                                          | 20-50  | 500       |
|                                                          | 10-20  | 250       |
|                                                          | <10    | 125       |
| Nitrofurantoin                                           | <45    | CI        |
| <b>IMMUNOSUPPRESSANTS</b>                                |        |           |
| Mycophenolic acid                                        | <25    | 2000      |
| Leflunomide                                              | <60    | CI        |
| Anakinra                                                 | <30    | CI        |
| Azathioprine                                             | <80    | 150       |
| Lenalidomide                                             | 30-60  | 10        |
|                                                          | <30    | 7.5       |
| Methotrexate                                             | <30    | CI        |
| <b>ANTIINFLAMMATORY AND ANTIRHEUMATIC PRODUCTS</b>       |        |           |
| Diclofenac                                               | <30    | CI        |
| Piroxicam                                                | <30    | CI        |
| Meloxicam                                                | <30    | CI        |
| Ibuprofen                                                | <30    | CI        |
| Naproxen                                                 | <30    | CI        |
| Ketoprofen                                               | 30-60  | 200       |
|                                                          | <30    | CI        |
| Flurbiprofen                                             | <30    | CI        |
| Tiaprofenic acid                                         | <30    | CI        |
| Diacerein                                                | <30    | 50        |
| <b>BLOOD SUBSTITUTES AND PERFUSION SOLUTIONS</b>         |        |           |
| Electrolytes solution for perfusion (Ex: Ionoven®)       | <30    | CI        |
| Magnesium sulfate                                        | <30    | CI        |
| <b>SEX HORMONES AND MODULATORS OF THE GENITAL SYSTEM</b> |        |           |
| Danazol                                                  | <30    | CI        |
| Raloxifene                                               | <30    | CI        |
| <b>PITUITARY AND HYPOTHALAMIC HORMONES AND ANALOGUES</b> |        |           |
| Desmopressin                                             | <50    | CI        |
| <b>ANTIMYCOTICS FOR SYSTEMIC USE</b>                     |        |           |
| Fluconazole                                              | <50    | 200       |
| <b>ANTIMYCOBACTERIALS</b>                                |        |           |
| Rifampicin                                               | <30    | 600       |
| Rifabutin                                                | <60    | CI        |
| Isoniazid                                                | <30    | 300       |
| Ethambutol                                               | 70-100 | 15MG/KG/D |
|                                                          | <70    | 10MG/KG/D |
| <b>ANTIVIRALS FOR SYSTEMIC USE</b>                       |        |           |
| Aciclovir                                                | >50    | 800       |
|                                                          | 25-50  | 600       |
|                                                          | 10-25  | 400       |
|                                                          | <10    | 200       |
| Ribavirin                                                | 30-50  | 400       |
|                                                          | <30    | 200       |
| Valaciclovir                                             | ≥50    | 3000      |
|                                                          | 30-49  | 200       |
|                                                          | 10-29  | 1000      |
|                                                          | <10    | 500       |
| Valganciclovir                                           | ≥60    | 900       |
|                                                          | 40-59  | 450       |
|                                                          | 25-39  | 450/2D    |

|                                                     |       |            |
|-----------------------------------------------------|-------|------------|
|                                                     | 10-24 | 900/WEEK   |
|                                                     | <10   | NR         |
| Lamivudine                                          | 30-50 | 50         |
|                                                     | 15-30 | 25         |
|                                                     | 6-15  | 15         |
|                                                     | <5    | 10         |
|                                                     | <15   | NR         |
| Abacavir                                            | <15   | NR         |
| Tenofovir disoproxil                                | 50-80 | 245/D      |
|                                                     | 30-50 | 857.5/WEEK |
|                                                     | 20-30 | 490/WEEK   |
|                                                     | 10-20 | 245/WEEK   |
| Emtricitabine                                       | ≥30   | 200        |
|                                                     | 15-30 | 200/72H    |
|                                                     | <15   | 200/96H    |
| Entecavir                                           | ≥50   | 1          |
|                                                     | 30-50 | 0.5        |
|                                                     | 10-30 | 0.3        |
|                                                     | <10   | 0.1        |
| <b>ANTINEOPLASTIC AGENTS</b>                        |       |            |
| Carboplatin                                         | <20   | CI         |
| Hydroxycarbamide                                    | <60   | 30MG/KG/D  |
| <b>IMMUNOSTIMULANTS</b>                             |       |            |
| Peg interferon alfa-2b                              | <30   | CI         |
| <b>DERMATOLOGICALS</b>                              |       |            |
| Terbinafine                                         | <30   | CI         |
| <b>TOPICAL PRODUCTS FOR JOINT AND MUSCULAR PAIN</b> |       |            |
| Ketoprofen (topicals)                               | <60   | NR         |
| Ibuprofen (topicals)                                | <30   | CI         |
| <b>MUSCLE RELAXANTS</b>                             |       |            |
| Baclofen                                            | <60   | 80         |
| <b>DRUGS FOR TREATMENT OF BONE DISEASES</b>         |       |            |
| Alendronic acid                                     | <35   | NR         |
| Risedronic acid                                     | <30   | CI         |
| Zoledronic acid                                     | <35   | CI         |
| Strontium ranelate                                  | <30   | NR         |
| <b>ANTI-PARKINSON DRUGS</b>                         |       |            |
| Ropinirole                                          | <30   | CI         |
| Pramipexole                                         | 20-50 | 1.57       |
|                                                     | <20   | 1.1        |
| <b>DRUGS FOR OBSTRUCTIVE AIRWAY DISEASES</b>        |       |            |
| Bambuterol                                          | <60   | 10         |
| <b>ANTIHISTAMINES FOR SYSTEMIC USE</b>              |       |            |
| Doxylamine                                          | <60   | 30         |
| Cetirizine                                          | 50-80 | 10         |
|                                                     | 30-49 | 5          |
|                                                     | 10-30 | 5 /2D      |
|                                                     | <10   | CI         |
| Levocetirizine                                      | 50-79 | 5          |
|                                                     | 30-49 | 5/2D       |
|                                                     | 10-30 | 5/3D       |
|                                                     | <10   | CI         |
| Rupatadine                                          | <60   | NR         |

| <b>OPHTHALMOLOGICALS</b>                 |     |     |
|------------------------------------------|-----|-----|
| Dorzolamide                              | <30 | CI  |
| Brinzolamide                             | <30 | CI  |
| <b>ALL OTHER THERAPEUTIC PRODUCTS</b>    |     |     |
| Magnesium (Magne B6®, Mag2®, Sympathyl®) | <30 | CI  |
| Hydroxychloroquine                       | <60 | 400 |

**B. Prescribing guidelines for antidiabetic agents examined in the study (according to the KDOQI 2012 recommendations<sup>a</sup>).**

| <b>Drugs</b>                  | <b>Creatinine clearance rate, ml/min/1.73m<sup>2</sup></b> | <b>Maximum recommended dose level, mg/day</b> |
|-------------------------------|------------------------------------------------------------|-----------------------------------------------|
| <b>DRUGS USED IN DIABETES</b> |                                                            |                                               |
| Metformin                     | 45-60                                                      | 2000                                          |
|                               | 30-45                                                      | 1000                                          |
|                               | <30                                                        | CI                                            |
| Glibenclamide                 | <60                                                        | CI                                            |
| Acarbose                      | <30                                                        | CI                                            |
| Miglitol                      | <25                                                        | CI                                            |
| Sitagliptin                   | 30-50                                                      | 50                                            |
|                               | <30                                                        | 25                                            |
| Vildagliptin                  | <50                                                        | 50                                            |
| Saxagliptin                   | ≤50                                                        | 2.5                                           |
| Exenatide                     | <30                                                        | NR                                            |
| Liraglutide                   | <60                                                        | NR                                            |

**C. Prescribing guidelines for antidiabetic agents examined in the study (according to the ERBP 2015 recommendations<sup>b</sup>).**

| <b>Drugs</b>                  | <b>Creatinine clearance rate, ml/min/1.73m<sup>2</sup></b> | <b>Maximum recommended dose level, mg/day</b> |
|-------------------------------|------------------------------------------------------------|-----------------------------------------------|
| <b>DRUGS USED IN DIABETES</b> |                                                            |                                               |
| Metformin                     | 30-60                                                      | 1500                                          |
|                               | 15-30                                                      | 500                                           |
|                               | <15                                                        | CI                                            |
| Glibenclamide                 | <15                                                        | CI                                            |
| Glimepiride                   | <15                                                        | CI                                            |
| Acarbose                      | <30                                                        | 50                                            |
| Miglitol                      | <30                                                        | 50                                            |
| Sitagliptin                   | 30-60                                                      | 50                                            |
|                               | <30                                                        | 25                                            |
| Vildagliptin                  | <60                                                        | 50                                            |
| Saxagliptin                   | <60                                                        | 2.5                                           |
| Exenatide                     | <30                                                        | NR                                            |
| Liraglutide                   | <60                                                        | NR                                            |

D: Day; CI: contraindicated; NR: not recommended

<sup>a</sup> National Kidney Foundation. KDOQI Clinical Practice Guideline for Diabetes and CKD: 2012 Update. *Am. J. Kidney Dis.* 60, 850–886 (2012)

<sup>b</sup> Guideline development group. Clinical Practice Guideline on management of patients with diabetes and chronic kidney disease stage 3b or higher (eGFR <45 mL/min). *Nephrol. Dial. Transplant. Off. Publ. Eur. Dial. Transpl. Assoc. - Eur. Ren. Assoc.* 30 Suppl 2, ii1-142 (2015)
