# Supplementary material
Source: PubMed Central journal article supplement (PMC6255993)
Supplement: BCP-84-2811-s005.pdf [file BCP-84-2811-s005.pdf]

**Evaluation of the adequacy of drug prescriptions in patients with chronic kidney disease: results from the CKD-REIN cohort**

S.M. Laville, M. Metzger, B. Stengel, C. Jacquelinet, C. Combe, D. Fouque, M. Laville, L. Frimat, C. Ayav, E. Speyer, B.M. Robinson, Z.A. Massy, S. Liabeuf

*British Journal of Clinical Pharmacology*

Corresponding author:

Bénédicte Stengel  
Director, Inserm U1018, Team 5  
UPS-UVSQ, CESP, Centre for Epidemiology and Population Health  
EpReC Team, Renal and Cardiovascular Epidemiology  
16, avenue P. Vaillant Couturier  
94 807 Villejuif cedex  
France  
Phone: + 33 1 4559 5039  
E-mail: benedicte.stengel@inserm.fr

**Supplementary Table 2: Details of drug prescriptions at baseline according to CKD stages and therapeutic classes.**

|                                         | STAGE                      |                                   |                               |                                   | p-value |
|-----------------------------------------|----------------------------|-----------------------------------|-------------------------------|-----------------------------------|---------|
|                                         | TOTAL<br>n = 3011<br>N (%) | STAGES 2 & 3A<br>n = 526<br>N (%) | STAGE 3B<br>n = 1126<br>N (%) | STAGES 4 & 5<br>n = 1359<br>N (%) |         |
| <b>ANTIHYPERTENSIVES</b>                |                            |                                   |                               |                                   |         |
| <i>Beta blockers</i>                    | 1254 (41.6%)               | 191 (36.3%)                       | 440 (39.1%)                   | 623 (45.8%)                       | <0.0001 |
| <i>Calcium channel blockers</i>         | 1445 (48.0%)               | 216 (41.1%)                       | 509 (45.2%)                   | 720 (53.0%)                       | <0.0001 |
| <i>Diuretics</i>                        |                            |                                   |                               |                                   |         |
| Thiazide and thiazide like diuretics    | 565 (18.8%)                | 114 (21.7%)                       | 222 (19.7%)                   | 229 (16.9%)                       | 0.0325  |
| Loop diuretics                          | 1108 (36.8%)               | 86 (16.3%)                        | 374 (33.2%)                   | 648 (47.7%)                       | <0.0001 |
| Potassium sparing diuretics             | 145 (4.8%)                 | 41 (7.8%)                         | 53 (4.7%)                     | 51 (3.8%)                         | 0.0011  |
| <i>RAS inhibitors</i>                   |                            |                                   |                               |                                   |         |
| ACE inhibitors                          | 1031 (34.2%)               | 174 (33.1%)                       | 390 (34.6%)                   | 467 (34.4%)                       | 0.8179  |
| Angiotensin II receptor antagonists     | 1369 (45.5%)               | 245 (46.6%)                       | 517 (45.9%)                   | 607 (44.7%)                       | 0.7028  |
| Renin inhibitors                        | 32 (1.1%)                  | 6 (1.1%)                          | 10 (0.9%)                     | 16 (1.2%)                         | 0.7685  |
| <i>Other antihypertensive agents</i>    | 367 (12.2%)                | 51 (9.7%)                         | 119 (10.6%)                   | 197 (14.5%)                       | 0.0019  |
| <b>LIPID MODIFYING AGENTS</b>           |                            |                                   |                               |                                   |         |
| <i>Statins</i>                          | 1757 (58.4%)               | 274 (52.1%)                       | 672 (59.7%)                   | 811 (59.7%)                       | 0.0059  |
| <i>Fibrates</i>                         | 94 (3.1%)                  | 26 (4.9%)                         | 31 (2.8%)                     | 37 (2.7%)                         | 0.0303  |
| <i>Ezetimibe</i>                        | 269 (8.9%)                 | 49 (9.3%)                         | 94 (8.3%)                     | 126 (9.3%)                        | 0.6840  |
| <i>Bile acid sequestrants</i>           | 4 (0.1%)                   | 0 (0%)                            | 3 (0.3%)                      | 1 (0.1%)                          | 0.3991* |
| <b>ANTIPLATELET THERAPY</b>             |                            |                                   |                               |                                   |         |
| <i>Aspirin</i>                          | 956 (31.8%)                | 156 (29.7%)                       | 357 (31.7%)                   | 443 (32.6%)                       | 0.4691  |
| <i>Clopidogrel</i>                      | 297 (9.9%)                 | 37 (7.0%)                         | 108 (9.6%)                    | 152 (11.2%)                       | 0.0235  |
| <i>Other</i>                            | 78 (2.6%)                  | 11 (2.1%)                         | 34 (3.0%)                     | 33 (2.4%)                         | 0.4765  |
| <b>DRUGS USED IN DIABETES</b>           |                            |                                   |                               |                                   |         |
| <i>Insulin</i>                          | 643 (21.4%)                | 86 (16.3%)                        | 234 (20.8%)                   | 232 (23.8%)                       | 0.0017  |
| <i>Injectable Incretin mimetics</i>     | 45 (1.5%)                  | 17 (3.2%)                         | 18 (1.6%)                     | 10 (0.7%)                         | 0.0003  |
| <i>Oral hypoglycemic agents</i>         |                            |                                   |                               |                                   |         |
| Metformin                               | 278 (9.2%)                 | 86 (16.3%)                        | 139 (12.3%)                   | 53 (3.9%)                         | <0.0001 |
| Glinides                                | 338 (11.2%)                | 36 (6.8%)                         | 131 (11.6%)                   | 171 (12.6%)                       | 0.0016  |
| Sulfonylureas                           | 154 (5.1%)                 | 42 (8.0%)                         | 74 (6.6%)                     | 38 (2.8%)                         | <0.0001 |
| Alpha glucosidase inhibitors            | 31 (1.0%)                  | 7 (1.3%)                          | 16 (1.4%)                     | 8 (0.6%)                          | 0.0928  |
| DPP inhibitors                          | 243 (8.1%)                 | 42 (8.0%)                         | 106 (9.4%)                    | 95 (7.0%)                         | 0.0871  |
| <b>DRUGS FOR ACID-RELATED DISORDERS</b> |                            |                                   |                               |                                   |         |
| <i>Antiacids</i>                        | 61 (2.0%)                  | 13 (2.5%)                         | 12 (1.1%)                     | 36 (2.6%)                         | 0.0149  |
| <i>Drugs for peptid ulcer</i>           |                            |                                   |                               |                                   |         |
| Proton pump inhibitors                  | 991 (32.9%)                | 140 (26.6%)                       | 381 (33.8%)                   | 470 (34.6%)                       | 0.0030  |
| H2 receptor antagonists                 | 12 (0.4%)                  | 4 (0.8%)                          | 4 (0.4%)                      | 4 (0.3%)                          | 0.3988* |
| <b>ANTI-GOUT PREPARATIONS</b>           |                            |                                   |                               |                                   |         |
| <i>Xanthine oxidase inhibitors</i>      |                            |                                   |                               |                                   |         |
| Allopurinol                             | 794 (26.4%)                | 100 (19.0%)                       | 262 (23.3%)                   | 432 (31.8%)                       | <0.0001 |
| Febuxostat                              | 207 (6.9%)                 | 24 (4.6%)                         | 77 (6.8%)                     | 106 (7.8%)                        | 0.0448  |
| <i>Colchicine</i>                       | 70 (2.3%)                  | 10 (1.9%)                         | 34 (3.0%)                     | 26 (1.9%)                         | 0.1478  |
| <b>ANALGESICS</b>                       |                            |                                   |                               |                                   |         |
| <i>Opioids</i>                          | 199 (6.6%)                 | 32 (6.1%)                         | 83 (7.4%)                     | 84 (6.2%)                         | 0.4278  |
| <i>Other analgesic</i>                  |                            |                                   |                               |                                   |         |
| including salicylic acid derivatives    | 61 (2.0%)                  | 9 (1.7%)                          | 23 (2.0%)                     | 29 (2.1%)                         | 0.8419  |
| including acetaminophen (paracetamol)   | 528 (17.5%)                | 89 (16.9%)                        | 194 (17.2%)                   | 245 (18.0%)                       | 0.8030  |
| <i>Antimigraine preparations</i>        | 9 (0.3%)                   | 2 (0.4%)                          | 6 (0.5%)                      | 1 (0.1%)                          | 0.0814* |

| <b>PSYCHOLEPTICS</b>                                    |              |             |             |             |         |
|---------------------------------------------------------|--------------|-------------|-------------|-------------|---------|
| <i>Antipsychotics</i>                                   | 188 (6.2%)   | 25 (4.8%)   | 72 (6.4%)   | 91 (6.7%)   | 0.2842  |
| <i>Anxiolytics</i>                                      | 312 (10.4%)  | 51 (9.7%)   | 122 (10.8%) | 139 (10.2%) | 0.7601  |
| <i>Hypnotics and sedatives</i>                          | 240 (8.0%)   | 44 (8.4%)   | 74 (6.6%)   | 122 (9.0%)  | 0.0824  |
| <b>MINERAL SUPPLEMENTS</b>                              | 480 (15.9%)  | 62 (11.8%)  | 135 (12.0%) | 283 (20.8%) | <0.0001 |
| <b>ANTICOAGULANTS</b>                                   |              |             |             |             |         |
| <i>Vitamin K antagonists</i>                            | 428 (14.2%)  | 58 (11.0%)  | 158 (14.0%) | 212 (15.6%) | 0.0378  |
| <i>Non Antivitamin K antagonist oral anticoagulants</i> | 12 (0.4%)    | 5 (1.0%)    | 4 (0.4%)    | 3 (0.2%)    | 0.0958* |
| <b>CARDIAC THERAPY</b>                                  | 432 (14.3%)  | 63 (12.0%)  | 160 (14.2%) | 209 (15.4%) | 0.1654  |
| <b>UROLOGICALS</b>                                      | 345 (11.5%)  | 64 (12.2%)  | 116 (10.3%) | 165 (12.1%) | 0.3058  |
| <b>PSYCHOANALEPTICS</b>                                 |              |             |             |             |         |
| <i>Antidepressants</i>                                  | 227 (7.5%)   | 36 (6.8%)   | 84 (7.5%)   | 107 (7.9%)  | 0.7436  |
| <i>Psychostimulants</i>                                 | 4 (0.1%)     | 1 (0.2%)    | 2 (0.2%)    | 1 (0.1%)    | 0.5316* |
| <i>Anti-dementia drugs</i>                              | 12 (0.4%)    | 4 (0.8%)    | 4 (0.4%)    | 4 (0.3%)    | 0.3988* |
| <b>ANTIEPILEPTICS</b>                                   | 188 (6.2%)   | 25 (4.8%)   | 72 (6.4%)   | 91 (6.7%)   | 0.2842  |
| <b>ANTIBACTERIALS FOR SYSTEMIC USE</b>                  | 182 (6.0%)   | 33 (6.3%)   | 67 (6.0%)   | 82 (6.0%)   | 0.9673  |
| <b>IMMUNOSUPPRESSANTS</b>                               | 167 (5.5%)   | 36 (6.8%)   | 61 (5.4%)   | 70 (5.2%)   | 0.3443  |
| <b>ANTIINFLAMMATORY AND ANTIRHEUMATIC PRODUCTS</b>      |              |             |             |             |         |
| <i>Non-steroidal anti-inflammatory antirheumatic</i>    | 43 (1.4%)    | 12 (2.3%)   | 14 (1.2%)   | 17 (1.3%)   | 0.1924  |
| <b>CKD-MBD DRUGS</b>                                    |              |             |             |             |         |
| <i>Phosphate binders</i>                                |              |             |             |             |         |
| Non calcium based phosphate binders                     | 65 (2.2%)    | 0 (0%)      | 6 (0.5%)    | 59 (4.3%)   | <0.0001 |
| Calcium based phosphate binders                         | 47 (1.6%)    | 2 (0.4%)    | 7 (0.6%)    | 38 (2.8%)   | <0.0001 |
| <i>Calcium carbonate</i>                                | 318 (10.6%)  | 39 (7.4%)   | 81 (7.2%)   | 198 (14.6%) | <0.0001 |
| <i>Vitamin D</i>                                        |              |             |             |             |         |
| Nutritional vitamin D only                              | 1422 (47.2%) | 206 (39.2%) | 483 (42.9%) | 733 (53.9%) | <0.0001 |
| Active vitamin D only                                   | 78 (2.6%)    | 6 (1.1%)    | 12 (1.1%)   | 60 (4.4%)   | <0.0001 |
| <i>Calcimimetic</i>                                     | 10 (0.3%)    | 0 (0%)      | 0 (0%)      | 10 (0.7%)   | 0.0016* |
| <b>ANTIANEMIC PREPARATIONS</b>                          |              |             |             |             |         |
| <i>Iron</i>                                             | 305 (10.1%)  | 23 (4.4%)   | 99 (8.8%)   | 183 (13.5%) | <0.0001 |
| <i>Erythropoietin stimulating agents</i>                | 231 (7.7%)   | 12 (2.3%)   | 45 (4.0%)   | 174 (12.8%) | <0.0001 |
| <b>POTASSIUM BINDING RESINS</b>                         | 387 (12.9%)  | 27 (5.1%)   | 111 (9.9%)  | 249 (18.3%) | <0.0001 |
| <b>THYROID THERAPY (Levothyroxine)</b>                  | 357 (11.9%)  | 57 (10.8%)  | 138 (12.3%) | 162 (11.9%) | 0.7044  |
| <b>CORTICOSTEROIDS FOR SYSTEMIC USE</b>                 | 218 (7.2%)   | 54 (10.3%)  | 71 (6.3%)   | 93 (6.8%)   | 0.0114  |
| <b>DRUGS FOR OBSTRUCTIVE AIRWAY DISEASES</b>            | 227 (7.5%)   | 43 (8.2%)   | 80 (7.1%)   | 104 (7.7%)  | 0.7280  |

ACE: angiotensin-converting-enzyme; CKD-MBD: Chronic Kidney Disease-Mineral and Bone Disorder; RAS: renin-angiotensin system
