# Supplementary material
Source: PubMed Central journal article supplement (PMC6255993)
Supplement: BCP-84-2811-s006.pdf [file BCP-84-2811-s006.pdf]

**Evaluation of the adequacy of drug prescriptions in patients with chronic kidney disease: results from the CKD-REIN cohort**

S.M. Laville, M. Metzger, B. Stengel, C. Jacquelinet, C. Combe, D. Fouque, M. Laville, L. Frimat, C. Ayav, E. Speyer, B.M. Robinson, Z.A. Massy, S. Liabeuf

*British Journal of Clinical Pharmacology*

Corresponding author:

Bénédicte Stengel  
Director, Inserm U1018, Team 5  
UPS-UVSQ, CESP, Centre for Epidemiology and Population Health  
EpReC Team, Renal and Cardiovascular Epidemiology  
16, avenue P. Vaillant Couturier  
94 807 Villejuif cedex  
France  
Phone: + 33 1 4559 5039  
E-mail: benedicte.stengel@inserm.fr

**Supplementary Table 3: Inappropriate prescriptions by ATC class (using SPCs as the reference)**

|                                                     | ATC class | Number of evaluable prescriptions | Number of contraindicated prescriptions | Number of overdosed prescriptions |
|-----------------------------------------------------|-----------|-----------------------------------|-----------------------------------------|-----------------------------------|
| <b>ANTIHYPERTENSIVES</b>                            |           |                                   |                                         |                                   |
| Rilmenidine                                         | C02AC06   | 204                               | 13                                      | NA                                |
| Moxonidine                                          | C02AC05   | 17                                | NA                                      | 6                                 |
| Hydrochlorothiazide                                 | C03AA03   | 106                               | 53                                      | NA                                |
| Indapamide                                          | C03BA11   | 53                                | 18                                      | NA                                |
| Spirolactone                                        | C03DA01   | 91                                | 32                                      | NA                                |
| Eplerenone                                          | C03DA04   | 21                                | 7                                       | NA                                |
| Amiloride                                           | C03DB01   | 10                                | 8                                       | NA                                |
| Hydrochlorothiazide and potassium-sparing diuretics | C03EA01   | 5                                 | 4                                       | NA                                |
| Altizide and potassium-sparing diuretics            | C03EA04   | 18                                | 7                                       | NA                                |
| Sotalol                                             | C07AA07   | 28                                | NA                                      | 6                                 |
| Nadolol                                             | C07AA12   | 11                                | NA                                      | 3                                 |
| Atenolol                                            | C07AB03   | 163                               | NA                                      | 42                                |
| Acebutolol                                          | C07AB04   | 56                                | NA                                      | 7                                 |
| Bisoprolol                                          | C07AB07   | 560                               | NA                                      | 13                                |
| Nebivolol                                           | C07AB12   | 297                               | 56                                      | NA                                |
| Bisoprolol and thiazide diuretic                    | C07BB07   | 12                                | 2                                       | NA                                |
| Nebivolol and thiazide diuretic                     | C07BB12   | 7                                 | 3                                       | NA                                |
| Atenolol and other antihypertensive agents          | C07FB03   | 14                                | 5                                       | NA                                |
| Lercanidipine                                       | C08CA13   | 403                               | 3                                       | NA                                |
| Perindopril                                         | C09AA04   | 186                               | NA                                      | 150                               |
| Ramipril                                            | C09AA05   | 468                               | NA                                      | 156                               |
| Benazepril                                          | C09AA07   | 6                                 | NA                                      | 1                                 |
| Trandolapril                                        | C09AA10   | 33                                | NA                                      | 14                                |
| Enalapril and diuretics                             | C09BA02   | 15                                | 7                                       | 1                                 |
| Lisinopril and diuretics                            | C09BA03   | 8                                 | 6                                       | NA                                |
| Perindopril and diuretics                           | C09BA04   | 60                                | 35                                      | 2                                 |
| Ramipril and diuretics                              | C09BA05   | 28                                | 15                                      | 6                                 |
| Quinapril et diuretics                              | C09BA06   | 1                                 | 1                                       | NA                                |
| Fosinopril and diuretics                            | C09BA09   | 3                                 | 2                                       | NA                                |
| Zofenopril and diuretics                            | C09BA15   | 2                                 | 2                                       | NA                                |
| Enalapril and calcic inhibitors                     | C09BB02   | 27                                | 9                                       | NA                                |
| Perindopril and amlodipine                          | C09BB04   | 68                                | NA                                      | 2                                 |
| Tandolapril and calcic inhibitors                   | C09BB10   | 9                                 | 7                                       | NA                                |
| Olmesartan                                          | C09CA08   | 102                               | 14                                      | 24                                |
| Losartan and diuretics                              | C09DA01   | 30                                | 14                                      | NA                                |
| Valsartan and diuretics                             | C09DA03   | 56                                | 22                                      | NA                                |
| Irbesartan and diuretics                            | C09DA04   | 143                               | 48                                      | NA                                |
| Candesartan and diuretics                           | C09DA06   | 28                                | 14                                      | 0                                 |
| Telmisartan and diuretics                           | C09DA07   | 24                                | 8                                       | NA                                |
| Olmesartan and diuretics                            | C09DA08   | 32                                | 5                                       | 0                                 |
| Diltiazem                                           | C08DB01   | 40                                | NA                                      | 31                                |
| Olmesartan and Amlodipine                           | C09DB02   | 41                                | 4                                       | 25                                |
| Valsartan, amlodipine and hydrochlorothiazide       | C09DX01   | 21                                | 8                                       | NA                                |
| Aliskiren                                           | C09XA02   | 21                                | 10                                      | NA                                |
| Aliskiren and hydrochlorothiazide                   | C09XA52   | 11                                | 6                                       | NA                                |
| <b>LIPID MODIFYING AGENTS</b>                       |           |                                   |                                         |                                   |
| Rosuvastatin                                        | C10AA07   | 444                               | 189                                     | 0                                 |
| Bezafibrate                                         | C10AB02   | 5                                 | 4                                       | NA                                |
| Gemfibrozil                                         | C10AB04   | 8                                 | 3                                       | NA                                |
| Fenofibrate                                         | C10AB05   | 77                                | 30                                      | NA                                |

|                                          |         |     |     |     |
|------------------------------------------|---------|-----|-----|-----|
| Ciprofibrate                             | C10AB08 | 4   | 3   | NA  |
| Simvastatin and ezetimibe                | C10BA02 | 150 | NA  | 51  |
| Pravastatin and acetylsalicylic acid     | C10BX02 | 5   | 2   | NA  |
| <b>ANTITHROMBOTIC AGENTS</b>             |         |     |     |     |
| Fluindione                               | Z-90751 | 330 | 53  | NA  |
| Acenocoumarol                            | B01AA07 | 23  | 1   | NA  |
| Warfarin                                 | B01AA03 | 85  | 11  | NA  |
| Tinzaparin                               | B01AB10 | 5   | 2   | NA  |
| Duoplavin                                | B01AC30 | 60  | 25  | NA  |
| Rivaroxaban                              | B01AF01 | 4   | NA  | 1   |
| <b>DRUGS USED IN DIABETES</b>            |         |     |     |     |
| Metformin                                | A10BA02 | 236 | 40  | 77  |
| Glibenclamide                            | A10BB01 | 20  | 6   | NA  |
| Glipizide                                | A10BB07 | 2   | 1   | NA  |
| Gliclazide                               | A10BB09 | 100 | 27  | NA  |
| Glimepiride                              | A10BB12 | 37  | 5   | NA  |
| Metformin and sitagliptin                | A10BD07 | 30  | 6   | 16  |
| Metformin and vildagliptin               | A10BD08 | 22  | 7   | 9   |
| Metformin and saxagliptin                | A10BD10 | 1   | 0   | 1   |
| Sitagliptin                              | A10BH01 | 69  | NA  | 40  |
| Vildagliptin                             | A10BH02 | 119 | NA  | 14  |
| Saxagliptin                              | A10BH03 | 5   | NA  | 4   |
| Exenatide                                | A10BX04 | 13  | 1   | NA  |
| Liraglutide                              | A10BX07 | 32  | 9   | NA  |
| <b>DRUGS FOR ACID-RELATED DISORDERS</b>  |         |     |     |     |
| Antiacid salt associations               | A02AD01 | 3   | 2   | NA  |
| Other associations of antiacids          | A02AX-9 | 3   | 2   | NA  |
| Ranitidine                               | A02BA02 | 11  | NA  | 5   |
| <b>ANTI-GOUT PREPARATIONS</b>            |         |     |     |     |
| Allopurinol                              | M04AA01 | 777 | NA  | 395 |
| Probenecid                               | M04AB01 | 2   | 2   | NA  |
| Colchicine                               | M04AC01 | 64  | 26  | 1   |
| <b>ANALGESICS</b>                        |         |     |     |     |
| Dihydrocodeine                           | N02AA08 | 1   | 1   | 0   |
| Codeine associated with psycholeptic     | N02AA59 | 21  | NA  | 2   |
| Tramadol                                 | N02AX02 | 86  | 19  | 0   |
| Associated tramadol                      | N02AX52 | 41  | NA  | 4   |
| Acid acetylsalicylic                     | N02BA01 | 61  | 29  | NA  |
| Paracetamol                              | N02BE01 | 214 | NA  | 18  |
| Paracetamol associated with psycholeptic | N02BE71 | 13  | NA  | 2   |
| <b>PSYCHOLEPTICS</b>                     |         |     |     |     |
| Risperidone                              | N05AX08 | 5   | NA  | 1   |
| Oxazepam                                 | N05BA04 | 21  | NA  | 2   |
| Lorazepam                                | N05BA06 | 34  | NA  | 2   |
| Prazepam                                 | N05BA11 | 18  | NA  | 4   |
| Alprazolam                               | N05BA12 | 67  | NA  | 16  |
| Nordazepam                               | N05BA16 | 2   | NA  | 1   |
| Etifoxine                                | N05BX03 | 4   | 2   | NA  |
| Lormetazepam                             | N05CD06 | 14  | NA  | 9   |
| Loprazolam                               | N05CD11 | 13  | NA  | 11  |
| <b>MINERAL SUPPLEMENTS</b>               |         |     |     |     |
| Calcium                                  | A12AA20 | 8   | 8   | NA  |
| Calcium associated                       | A12AX-9 | 163 | 25  | NA  |
| Potassium chloride                       | A12BA01 | 155 | 154 | NA  |
| Potassium citrate                        | A12BA02 | 3   | 2   | NA  |

|                                        |         |    |    |    |
|----------------------------------------|---------|----|----|----|
| Potassium carbonate acid               | A12BA04 | 2  | 2  | NA |
| Magnesium lactate                      | A12CC06 | 1  | 1  | NA |
| Magnesium                              | A12CC08 | 10 | 6  | NA |
| Magnesium oxide                        | A12CC10 | 1  | 1  | NA |
| Other mineral element                  | A12CX-L | 1  | 1  | NA |
| Magnesium                              | Z91231  | 1  | 1  | NA |
| Magnesium                              | Z92554  | 1  | 1  | NA |
| Magnesium                              | Z92071  | 7  | 3  | NA |
| Magnesium                              | Z90560  | 19 | 12 | NA |
| Magnesium                              | Z91231  | 1  | 1  | NA |
| <b>CARDIAC THERAPY</b>                 |         |    |    |    |
| Digoxin                                | C01AA05 | 28 | NA | 8  |
| Flecainide                             | C01BC04 | 54 | NA | 3  |
| Midodrine                              | C01CA17 | 6  | 4  | NA |
| Trimetazidine                          | C01EB15 | 5  | 3  | 0  |
| <b>UROLOGICALS</b>                     |         |    |    |    |
| Alfuzosin                              | G04CA01 | 86 | 44 | NA |
| Silodosin                              | G04CA04 | 26 | 5  | NA |
| <b>PSYCHOANALEPTICS</b>                |         |    |    |    |
| Amitriptyline                          | N06AA09 | 6  | NA | 3  |
| Citalopram                             | N06AB04 | 17 | 4  | NA |
| Paroxetine                             | N06AB05 | 39 | NA | 7  |
| Milnacipran                            | N06AX17 | 2  | NA | 2  |
| Duloxetine                             | N06AX21 | 20 | 6  | NA |
| Piracetam                              | N06BX03 | 2  | 1  | 0  |
| <b>ANTIEPILEPTICS</b>                  |         |    |    |    |
| Clonazepam                             | N03AE01 | 11 | NA | 6  |
| Valproic acid                          | N03AG01 | 12 | NA | 1  |
| Topiramate                             | N03AX11 | 5  | NA | 1  |
| Gabapentin                             | N03AX12 | 32 | NA | 7  |
| Levetiracetam                          | N03AX14 | 11 | NA | 1  |
| Pregabalin                             | N03AX16 | 87 | NA | 14 |
| <b>ANTIINFECTIVES FOR SYSTEMIC USE</b> |         |    |    |    |
| Amoxicillin                            | J01CA04 | 22 | NA | 9  |
| Amoxicillin and clavulanic acid        | J01CR02 | 14 | NA | 7  |
| Cephalexin                             | J01DB01 | 1  | NA | 1  |
| Cefpodoxime                            | J01DD13 | 4  | NA | 2  |
| Sulfamethoxazole et trimethoprim       | J01EE01 | 54 | NA | 2  |
| Clarithromycin                         | J01FA09 | 1  | NA | 1  |
| Nitrofurantoin                         | J01XE01 | 4  | 3  | NA |
| Ofloxacin                              | J01MA01 | 8  | NA | 4  |
| Ciprofloxacin                          | J01MA02 | 7  | NA | 1  |
| Levofloxacin                           | J01MA12 | 5  | NA | 2  |
| Rifabutin                              | J04AB04 | 1  | 1  | NA |
| Ethambutol                             | J04AK02 | 1  | NA | 1  |
| Ribavirin                              | J05AB04 | 2  | NA | 1  |
| Lamivudine                             | J05AF05 | 2  | NA | 1  |
| Tenofovir                              | J05AF07 | 4  | NA | 2  |
| Entecavir                              | J05AF10 | 7  | NA | 2  |
| Anti-HIV associations                  | J05AF30 | 5  | 3  | NA |
| <b>IMMUNOSUPPRESSANTS</b>              |         |    |    |    |
| Mycophenolic acid                      | L04AA06 | 69 | NA | 2  |
| Leflunomide                            | L04AA13 | 1  | 1  | NA |
| Anakinra                               | L04AC03 | 1  | 1  | NA |
| Azathioprine                           | L04AX01 | 34 | NA | 1  |

|                                                          |         |    |    |    |
|----------------------------------------------------------|---------|----|----|----|
| Methotrexate                                             | L04AX03 | 6  | 2  | NA |
| <b>ANTIINFLAMMATORY AND ANTIRHEUMATIC PRODUCTS</b>       |         |    |    |    |
| Diclofenac                                               | M01AB05 | 4  | 2  | NA |
| Piroxicam                                                | M01AC01 | 2  | 2  | NA |
| Ibuprofen                                                | M01AE01 | 2  | 1  | NA |
| Ketoprofen                                               | M01AE03 | 3  | 1  | NA |
| Flurbiprofen                                             | M01AE09 | 2  | 1  | NA |
| Tiaprofenic acid                                         | M01AE11 | 2  | 2  | NA |
| <b>DRUGS FOR FUNCTIONAL GASTROINTESTINAL DISORDERS</b>   |         |    |    |    |
| Domperidone                                              | A03FA03 | 17 | NA | 4  |
| <b>DRUGS FOR CONSTIPATION</b>                            |         |    |    |    |
| Paraffin Oil                                             | A06AA51 | 3  | 2  | NA |
| <b>INTESTINAL ANTIINFLAMMATORY AGENTS</b>                |         |    |    |    |
| Mesalazine                                               | A07EC02 | 4  | 2  | NA |
| <b>BLOOD SUBSTITUTES AND PERFUSION SOLUTIONS</b>         |         |    |    |    |
| Electrolytes                                             | B05BB01 | 3  | 3  | NA |
| <b>PITUITARY AND HYPOTHALAMIC HORMONES AND ANALOGUES</b> |         |    |    |    |
| Desmopressin                                             | H01BA02 | 3  | 2  | NA |
| <b>TOPICAL PRODUCTS FOR JOINT AND MUSCULAR PAIN</b>      |         |    |    |    |
| Ketoprofen                                               | M02AA10 | 5  | 4  | NA |
| Ibuprofen                                                | M02AA13 | 1  | 1  | NA |
| <b>DRUGS FOR TREATMENT OF BONE DISEASES</b>              |         |    |    |    |
| Alendronic Acid                                          | M05BA04 | 13 | 6  | NA |
| Risedronic acid                                          | M05BA07 | 17 | 5  | NA |
| Alendronic Acid and cholecalciferol                      | M05BB03 | 13 | 6  | NA |
| <b>ANTI-PARKINSON DRUGS</b>                              |         |    |    |    |
| Ropinirole                                               | N04BC04 | 5  | 4  | NA |
| <b>OTHER NERVOUS SYSTEM DRUGS</b>                        |         |    |    |    |
| Acamprosate                                              | N07BB03 | 1  | 1  | NA |
| <b>ANTIPROTOZOALS</b>                                    |         |    |    |    |
| Proguanil associated                                     | P01BB51 | 1  | 1  | NA |
| <b>ANTIHISTAMINES FOR SYSTEMIC USE</b>                   |         |    |    |    |
| Cetirizine                                               | R06AE07 | 14 | NA | 13 |
| Levocetirizine                                           | R06AE09 | 18 | NA | 15 |
| Rupatadine                                               | R06AX28 | 6  | 6  | NA |
| <b>OPHTHALMOLOGICALS</b>                                 |         |    |    |    |
| Brinzolamide                                             | S01EC04 | 7  | 2  | NA |

ATC: Anatomical Therapeutic and Chemical; NA: not applicable; SPC: Summary of Product Characteristics
