# Supplementary material
Source: PubMed Central journal article supplement (PMC6255993)
Supplement: BCP-84-2811-s007.pdf [file BCP-84-2811-s007.pdf]

**Evaluation of the adequacy of drug prescriptions in patients with chronic kidney disease: results from the CKD-REIN cohort**

S.M. Laville, M. Metzger, B. Stengel, C. Jacquelinet, C. Combe, D. Fouque, M. Laville, L. Frimat, C. Ayav, E. Speyer, B.M. Robinson, Z.A. Massy, S. Liabeuf

*British Journal of Clinical Pharmacology*

Corresponding author:

Bénédicte Stengel  
Director, Inserm U1018, Team 5  
UPS-UVSQ, CESP, Centre for Epidemiology and Population Health  
EpReC Team, Renal and Cardiovascular Epidemiology  
16, avenue P. Vaillant Couturier  
94 807 Villejuif cedex  
France  
Phone: + 33 1 4559 5039  
E-mail: benedicte.stengel@inserm.fr

**Supplementary Table 4: Agreement between the CKD-EPI or de-indexed CKD-EPI equations and Cockcroft-Gault equation**

A. Agreement in evaluating contraindications (CIs) B. Agreement in evaluating inappropriately high doses (IHDs)

**A. Agreement in evaluating contraindications (CIs)**

|                   |       | CKD-EPI                       |            | De-indexed CKD-EPI                       |            |
|-------------------|-------|-------------------------------|------------|------------------------------------------|------------|
|                   |       | No CI                         | CI         | No CI                                    | CI         |
| Cockcroft-Gault   | No CI | 22396 (94.3%)                 | 557 (2.3%) | 22646 (95.4%)                            | 307 (1.3%) |
|                   | CI    | 61 (0.3%)                     | 728 (3.1%) | 33 (0.1%)                                | 756 (3.2%) |
| Kappa coefficient |       | <b>K CG vs. CKD-EPI= 0.69</b> |            | <b>K CG vs. De-indexed CKD-EPI= 0.81</b> |            |

**B. Agreement in evaluating inappropriately high doses (IHDs)**

|                   |        | CKD-EPI                       |            | De-indexed CKD-EPI                       |            |
|-------------------|--------|-------------------------------|------------|------------------------------------------|------------|
|                   |        | No IHD                        | IHD        | No IHD                                   | IHD        |
| Cockcroft-Gault   | No IHD | 21785 (94.3%)                 | 337 (1.5%) | 21507 (94.9%)                            | 178 (0.8%) |
|                   | IHD    | 47 (0.2%)                     | 938 (4.0%) | 31 (0.1%)                                | 952 (4.2%) |
| Kappa coefficient |        | <b>K CG vs. CKD-EPI= 0.82</b> |            | <b>K CG vs. De-indexed CKD-EPI= 0.90</b> |            |
